# Supplementary material for: A Novel Plant-Derived Choline Transporter-like Protein 1 Inhibitor, Amb544925, Induces Apoptotic Cell Death via the Ceramide/Survivin Pathway in Tongue Squamous Cell Carcinoma
Source: MDPI journal article supplement (doi:10.3390/cancers14020329), 2022-01-10
Supplement: s1 [file s1]

# Supplementary Materials

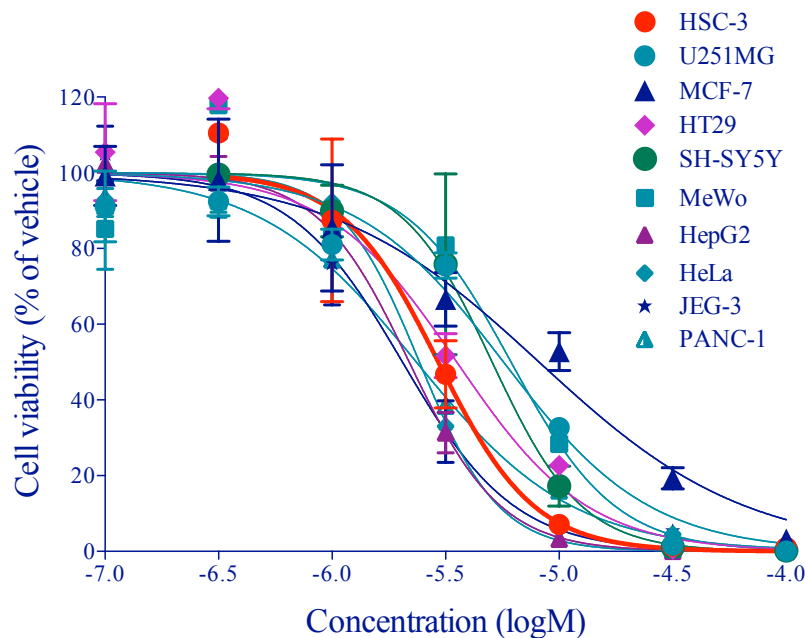

|         |                            |
|---------|----------------------------|
| HSC-3   | Oral squamous carcinoma    |
| U251MG  | Glioma                     |
| MCF-7   | Breast cancer cells        |
| HT29    | Colon adenocarcinoma       |
| SH-SY5Y | Neuroblastoma              |
| MeWo    | Melanoma                   |
| HepG2   | Hepatocellular carcinoma   |
| HeLa    | Cervix adenocarcinoma      |
| JEG-3   | Choriocarcinoma            |
| PANC-1  | Pancreatic carcinoma cells |

**Figure S1:** Effect of Amb544925 on cell viability in various cancer cell lines. Cells were pre-incubated with various concentrations of Amb544925 for 24h, and then the cells were counted. The results are given as a percentage of the findings in the vehicle control. Each point represents the mean  $\pm$  S.D.(n=4).
