# Supplementary material for: A Novel Plant-Derived Choline Transporter-like Protein 1 Inhibitor, Amb544925, Induces Apoptotic Cell Death via the Ceramide/Survivin Pathway in Tongue Squamous Cell Carcinoma
Source: MDPI journal article supplement (doi:10.3390/cancers14020329), 2022-01-10
Supplement: s1 [file s1]

Fig.3C . Detection of SMPD4 and GAPDH proteins by Western blot analysis.

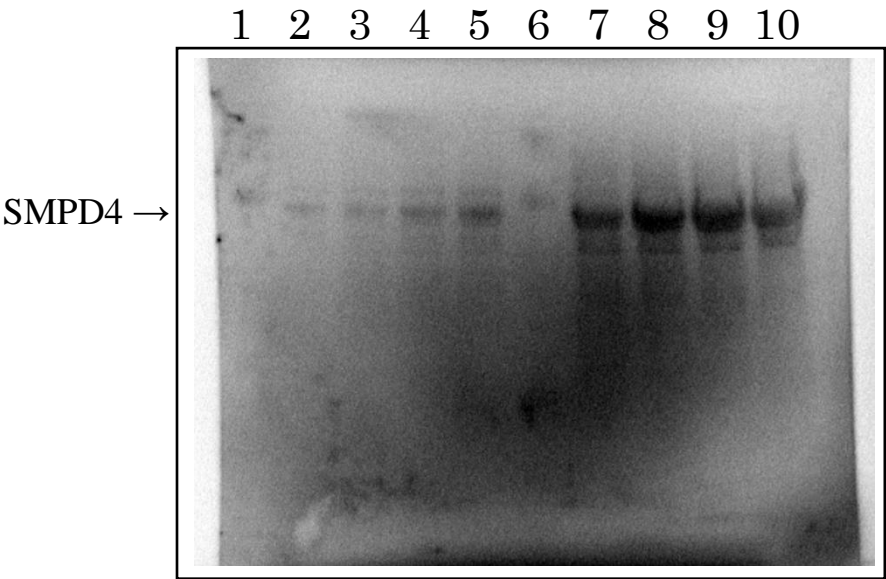

Lane 1: 5μL Prestained Molecular Weight Marker  
Lane 2: 20μL lysates of HSC-3 cells with vehicle for 2 h  
Lane 3: 20μL lysates of HSC-3 cells with vehicle for 2 h  
Lane 4: 20μL lysates of HSC-3 cells with vehicle for 2 h  
Lane 5: 20μL lysates of HSC-3 cells with vehicle for 2 h  
Lane 6: 5μL Prestained Molecular Weight Marker  
Lane 7: 20μL lysates of HSC-3 cells treated with 30μM Amb544925 for 2 h  
Lane 8: 20μL lysates of HSC-3 cells treated with 30μM Amb544925 for 2 h  
Lane 9: 20μL lysates of HSC-3 cells treated with 30μM Amb544925 for 2 h  
Lane 10: 20μL lysates of HSC-3 cells treated with 30μM Amb544925 for 2 h

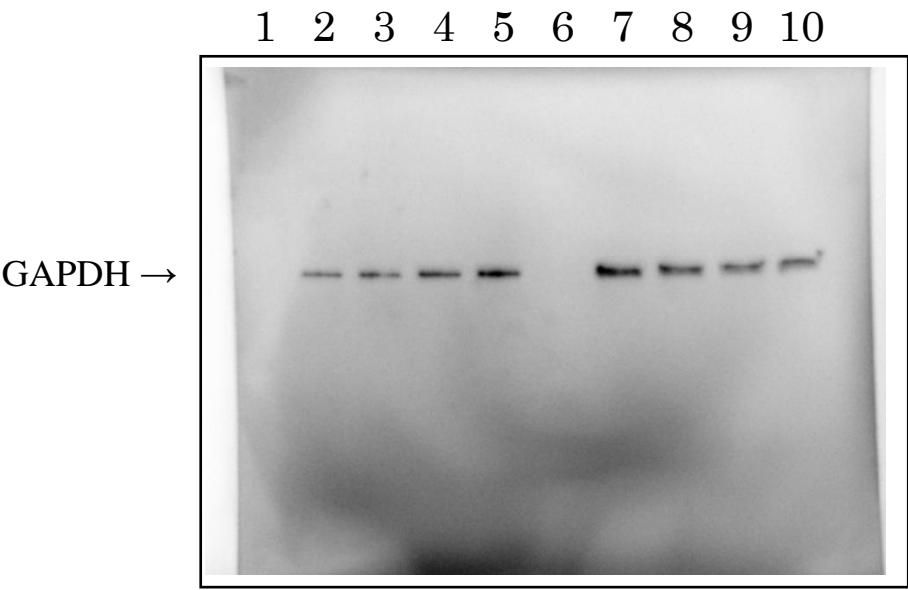

Lane 1: 5μL Prestained Molecular Weight Marker  
Lane 2: 20μL lysates of HSC-3 cells with vehicle for 2 h  
Lane 3: 20μL lysates of HSC-3 cells with vehicle for 2 h  
Lane 4: 20μL lysates of HSC-3 cells with vehicle for 2 h  
Lane 5: 20μL lysates of HSC-3 cells with vehicle for 2 h  
Lane 6: 5μL Prestained Molecular Weight Marker  
Lane 7: 20μL lysates of HSC-3 cells treated with 30μM Amb544925 for 2 h  
Lane 8: 20μL lysates of HSC-3 cells treated with 30μM Amb544925 for 2 h  
Lane 9: 20μL lysates of HSC-3 cells treated with 30μM Amb544925 for 2 h  
Lane 10: 20μL lysates of HSC-3 cells treated with 30μM Amb544925 for 2 h

Fig.5A . Detection of Survivin and  $\beta$ -actin proteins by Western blot analysis.

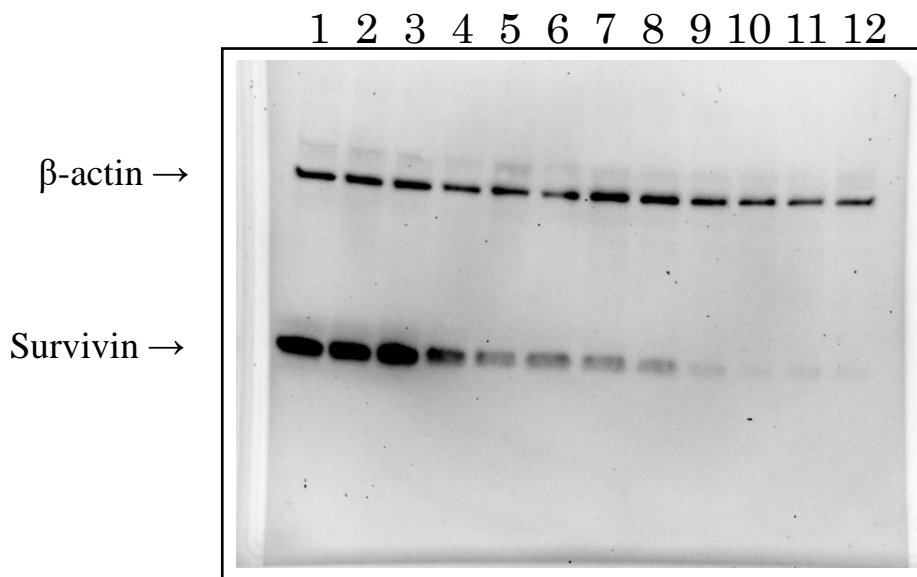

Lane 1: 20 $\mu$ L lysates of HSC-3 cells with Vehicle for 8 h

Lane 2: 20 $\mu$ L lysates of HSC-3 cells with Vehicle for 8 h

Lane 3: 20 $\mu$ L lysates of HSC-3 cells with Vehicle for 8 h

Lane 4: 20 $\mu$ L lysates of HSC-3 cells treated with 30 $\mu$ M Amb544925 for 8 h

Lane 5: 20 $\mu$ L lysates of HSC-3 cells treated with 30 $\mu$ M Amb544925 for 8 h

Lane 6: 20 $\mu$ L lysates of HSC-3 cells treated with 30 $\mu$ M Amb544925 for 8 h

Lane 7: 20 $\mu$ L lysates of HSC-3 cells treated with 60 $\mu$ M Amb544925 for 8 h

Lane 8: 20 $\mu$ L lysates of HSC-3 cells treated with 60 $\mu$ M Amb544925 for 8 h

Lane 9: 20 $\mu$ L lysates of HSC-3 cells treated with 60 $\mu$ M Amb544925 for 8 h

Lane 10: 20 $\mu$ L lysates of HSC-3 cells treated with 90 $\mu$ M Amb544925 for 8 h

Lane 11: 20 $\mu$ L lysates of HSC-3 cells treated with 90 $\mu$ M Amb544925 for 8 h

Lane 12: 20 $\mu$ L lysates of HSC-3 cells treated with 90 $\mu$ M Amb544925 for 8 h

Fig.5B . Detection of Survivin and  $\beta$ -actin proteins by Western blot analysis.

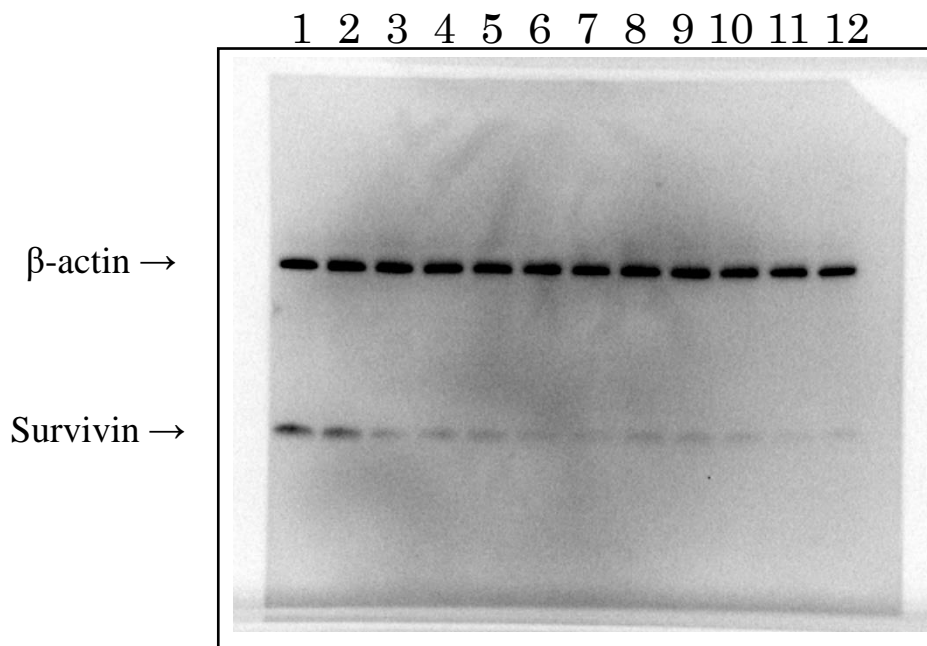

- Lane 1: 20 $\mu$ L lysates of HSC-3 cells with Vehicle for 8 h  
Lane 2: 20 $\mu$ L lysates of HSC-3 cells with Vehicle for 8 h  
Lane 3: 20 $\mu$ L lysates of HSC-3 cells with Vehicle for 8 h  
Lane 4: 20 $\mu$ L lysates of HSC-3 cells treated with 50 $\mu$ M C2 ceramide for 8 h  
Lane 5: 20 $\mu$ L lysates of HSC-3 cells treated with 50 $\mu$ M C2 ceramide for 8 h  
Lane 6: 20 $\mu$ L lysates of HSC-3 cells treated with 50 $\mu$ M C2 ceramide for 8 h  
Lane 7: 20 $\mu$ L lysates of HSC-3 cells treated with 75 $\mu$ M C2 ceramide for 8 h  
Lane 8: 20 $\mu$ L lysates of HSC-3 cells treated with 75 $\mu$ M C2 ceramide for 8 h  
Lane 9: 20 $\mu$ L lysates of HSC-3 cells treated with 75 $\mu$ M C2 ceramide for 8 h  
Lane 10: 20 $\mu$ L lysates of HSC-3 cells treated with 100 $\mu$ M C2 ceramide for 8 h  
Lane 11: 20 $\mu$ L lysates of HSC-3 cells treated with 100 $\mu$ M C2 ceramide for 8 h  
Lane 12: 20 $\mu$ L lysates of HSC-3 cells treated with 100 $\mu$ M C2 ceramide for 8 h
